# Supplementary material
Source: publisher figshare collection journal article supplement (https://gsapubs.figshare.com/ndownloader/files/30834400)
Supplement: Supplementary file 1 [file 30834400]

## Sheet: Sheet1
Supplementary Table 1
LA-ICP-MS U-Pb isotopic data for zircons from the Daocheng batholith.
Sample no.	Pb/ppm	Th/ppm	U/ppm	Th/U	Isotopic ratios						Ages
					207Pb/206Pb	1σ	207Pb/235U	1σ	206Pb/238U	1σ	207Pb/206Pb	1σ	207Pb/235U	1σ	206Pb/238U	1σ
18DC48-1	18.8483	230.662	425.622	0.541941	0.049882	0.00144532	0.234737	0.00710776	0.034176	0.000530031	190.82	66.655	214.102	5.84512	216.631	3.30388
18DC48-2	33.1313	431.944	758.635	0.56937	0.0508431	0.0012522	0.236048	0.006177	0.0336547	0.000453312	235.25	62.025	215.179	5.0743	213.382	2.82709
18DC48-3	19.3101	277.959	431.375	0.644356	0.0499416	0.00164262	0.231487	0.00734564	0.033808	0.000511629	190.82	105.54	211.426	6.05669	214.337	3.19031
18DC48-4	33.7341	469.65	761.218	0.616972	0.0509065	0.00112104	0.236037	0.00566532	0.0336358	0.000497434	235.25	51.8425	215.17	4.654	213.263	3.10231
18DC48-5	38.0774	586.235	841.015	0.697056	0.0509861	0.0012147	0.236973	0.00616434	0.0336533	0.000409941	238.955	55.545	215.939	5.06011	213.373	2.55661
18DC48-6	23.0371	355.893	521.551	0.682375	0.0530553	0.00144523	0.247128	0.0080195	0.0337124	0.000571017	331.54	28.7	224.241	6.52938	213.741	3.56096
18DC48-7	21.5667	240.404	497.384	0.483338	0.0509673	0.00136635	0.2398	0.00669596	0.0341603	0.000479333	238.955	61.1	218.257	5.48398	216.533	2.98791
18DC48-8	26.4588	416.689	573.157	0.727007	0.0536212	0.00136044	0.247053	0.00661925	0.0334791	0.000491542	353.76	57.4	224.179	5.38962	212.286	3.06603
18DC48-9	22.2511	293.248	500.067	0.586418	0.0496202	0.0012196	0.231962	0.00635016	0.0339656	0.00056209	176.01	57.395	211.817	5.23385	215.32	3.50443
18DC48-10	21.6417	295.953	482.04	0.613959	0.0522104	0.00170042	0.245128	0.00812597	0.0341575	0.000547119	294.505	75.915	222.611	6.6267	216.516	3.41047
18DC48-11	38.2538	804.336	731.824	1.09908	0.0504542	0.00136118	0.244003	0.00698857	0.0351236	0.000545437	216.74	61.1	221.693	5.70429	222.536	3.3968
18DC48-12	26.6858	375.317	574.837	0.65291	0.0531672	0.00161539	0.257347	0.00937782	0.0350929	0.000694207	344.5	100.915	232.527	7.5733	222.345	4.32343
18DC48-13	24.1053	375.924	506.296	0.742497	0.0498074	0.00138355	0.236692	0.00652046	0.0347652	0.000612493	187.12	64.8025	215.708	5.35366	220.303	3.81573
18DC48-14	22.7908	282.831	507.393	0.55742	0.0568119	0.00210781	0.269235	0.0118184	0.0341044	0.000556813	483.375	49.07	242.082	9.45497	216.185	3.47107
18DC48-15	22.7999	256.601	515.081	0.498175	0.0539665	0.00162379	0.253085	0.00802616	0.0343067	0.000771421	368.57	66.66	229.079	6.50374	217.446	4.80795
18DC48-16	18.154	204.521	425.97	0.480129	0.0498655	0.00141835	0.232277	0.00723549	0.0339063	0.000571534	187.12	66.655	212.077	5.96203	214.95	3.56352
18DC48-17	24.8842	339.044	567.334	0.597608	0.0509979	0.00147047	0.236383	0.0073305	0.0338045	0.000577195	238.955	66.655	215.455	6.02026	214.315	3.59917
18DC48-18	27.9688	391.745	621.831	0.629986	0.0524199	0.00150429	0.248622	0.00809697	0.0343661	0.000553643	305.615	66.66	225.457	6.58457	217.816	3.45043
18DC48-19	25.0962	508.675	534.541	0.951611	0.0535292	0.00164187	0.246637	0.00844496	0.0333864	0.000480477	350.055	70.365	223.841	6.8785	211.708	2.99728
18DC65-01	72.3201	652.614	819.505	0.796351	0.05244	0.00099	0.24586	0.00484	0.03388	0.00032	305	28	223	4	215	2
18DC65-02	20.4195	172.293	306.909	0.561381	0.05097	0.00165	0.23866	0.00756	0.03399	0.0004	239	51	217	6	215	3
18DC65-03	65.9425	542.219	938.558	0.577715	0.05196	0.00099	0.24415	0.00461	0.03401	0.00032	284	26	222	4	216	2
18DC65-04	27.9859	203.196	433.174	0.469087	0.05295	0.00135	0.24865	0.00645	0.03405	0.0004	327	37	225	5	216	3
18DC65-05	54.0812	399.441	886.157	0.450756	0.04976	0.00093	0.23321	0.00426	0.03391	0.00029	184	27	213	4	215	2
18DC65-06	16.4707	133.649	254.284	0.525588	0.05063	0.00171	0.237	0.00778	0.03401	0.00039	224	54	216	6	216	2
18DC65-07	46.819	398.005	663.885	0.59951	0.05066	0.00108	0.23801	0.00491	0.03404	0.00031	225	31	217	4	216	2
18DC65-08	54.9127	416.664	821.943	0.506926	0.05216	0.00103	0.2447	0.0048	0.03395	0.00029	292	29	222	4	215	2
18DC65-09	21.9989	164.411	331.236	0.496356	0.04971	0.00143	0.23064	0.00608	0.03383	0.00036	182	41	211	5	214	2
18DC65-10	32.6923	291.653	371.456	0.785163	0.04999	0.00141	0.23306	0.00602	0.03395	0.00032	195	42	213	5	215	2
18DC65-11	57.2681	422.16	854.774	0.493885	0.05077	0.00101	0.23841	0.00483	0.03399	0.00027	231	32	217	4	215	2
18DC65-12	93.6784	699.94	1272.58	0.550018	0.05074	0.00093	0.23733	0.00448	0.03384	0.00026	229	29	216	4	215	2
18DC65-13	45.4946	356.427	611.904	0.582489	0.05217	0.0012	0.24384	0.00537	0.03393	0.0003	293	34	222	4	215	2
18DC65-14	24.0757	201.727	324.131	0.622362	0.05111	0.00169	0.23805	0.00737	0.03393	0.00032	246	54	217	6	215	2
18DC65-15	47.8997	342.433	791.183	0.432812	0.05134	0.00103	0.24057	0.00484	0.0339	0.00027	256	31	219	4	215	2
18DC65-16	42.9919	325.03	670.078	0.485063	0.0509	0.00108	0.23884	0.00501	0.03397	0.0003	236	32	217	4	215	2
18DC45-01	13.7291	109.602	198.715	0.551557	0.05027	0.00152	0.23663	0.00699	0.0342	0.00044	208	45	216	6	217	3
18DC45-02	80.5597	599.108	1392.23	0.430324	0.05069	0.00086	0.23736	0.00386	0.03386	0.00028	227	22	216	3	215	2
18DC45-03	14.8001	122.663	223.262	0.549414	0.05148	0.0013	0.24302	0.00622	0.03414	0.00035	263	40	221	5	216	2
18DC45-04	63.2166	534.959	872.091	0.613421	0.0508	0.00097	0.23966	0.00459	0.03412	0.00032	232	27	218	4	216	2
18DC45-05	46.3092	384.703	710.891	0.541156	0.04886	0.0009	0.23103	0.00444	0.03421	0.00038	141	25	211	4	217	2
18DC45-06	97.6154	1008.18	1099.88	0.916622	0.0505	0.00092	0.23767	0.00436	0.03399	0.00029	218	27	217	4	215	2
18DC45-07	63.724	476.54	1085.25	0.439106	0.05021	0.00091	0.23364	0.00419	0.03362	0.00029	205	26	213	3	213	2
18DC45-08	51.354	401.453	845.469	0.474828	0.05204	0.0009	0.24617	0.00441	0.03418	0.00032	287	24	223	4	217	2
18DC45-09	97.2197	733.095	1653.86	0.443263	0.0504	0.00074	0.2366	0.00351	0.03391	0.00025	214	21	216	3	215	2
18DC45-10	68.2638	510.746	1240.27	0.411801	0.05116	0.00078	0.2365	0.00375	0.03337	0.00025	248	23	216	3	212	2
18DC45-11	29.2303	268.405	389.21	0.689615	0.05176	0.00112	0.24388	0.00545	0.03412	0.00043	275	29	222	4	216	3
18DC45-12	53.3362	386.337	931.568	0.414717	0.05158	0.00094	0.244	0.00481	0.03419	0.00038	267	26	222	4	217	2
18DC45-13	27.9534	249.722	371.931	0.67142	0.05112	0.00123	0.24162	0.00591	0.03416	0.00032	246	39	220	5	217	2
18DC45-14	173.687	1519.5	2666.88	0.569768	0.05094	0.00066	0.23808	0.00313	0.03376	0.00022	238	19	217	3	214	1
18DC45-15	73.7493	684.914	1003.43	0.68257	0.05097	0.00086	0.23563	0.00385	0.03343	0.00023	240	25	215	3	212	1
18DC45-16	109.519	1135.09	1107.36	1.02504	0.05035	0.00082	0.23691	0.00389	0.03401	0.00025	211	24	216	3	216	2
18DC45-17	45.6758	372.77	717.364	0.519638	0.05211	0.00093	0.24575	0.00434	0.03415	0.00031	290	24	223	4	216	2
18DC45-18	56.5927	417.557	910.142	0.458782	0.05182	0.00092	0.24357	0.00423	0.03404	0.00032	278	23	221	3	216	2
18DC50-1	19.036	257.232	412.503	0.623589	0.0506554	0.00109654	0.245948	0.00599283	0.0351703	0.000489133	233.4	49.99	223.279	4.88389	222.827	3.04602
18DC50-2	26.5745	387.856	605.061	0.641021	0.0502097	0.00122026	0.230331	0.00552421	0.0333825	0.000393177	205.63	57.3975	210.472	4.55912	211.684	2.4527
18DC50-3	27.8042	444.211	636.842	0.697521	0.0513265	0.00141178	0.234927	0.00640926	0.0334264	0.000484893	253.77	62.9525	214.258	5.26988	211.958	3.02471
18DC50-4	18.2362	241.675	422.596	0.571882	0.050838	0.0014198	0.231765	0.00664084	0.0331944	0.000468431	235.25	64.805	211.655	5.47431	210.51	2.92268
18DC50-5	25.5365	355.079	592.957	0.598827	0.051125	0.00135563	0.232709	0.0061701	0.0331439	0.000431052	255.62	61.1	212.433	5.08235	210.195	2.6896
18DC50-6	28.9183	431.186	665.893	0.64753	0.0506813	0.00112669	0.233851	0.00571473	0.0334587	0.000444375	233.4	51.8425	213.372	4.7029	212.159	2.77188
18DC50-7	20.0446	270.491	464.53	0.582291	0.0519127	0.00128264	0.246983	0.00726308	0.0345384	0.000597924	283.395	55.55	224.123	5.91419	218.89	3.72578
18DC50-8	30.0208	396.149	674.763	0.587093	0.054521	0.00126282	0.259576	0.00677508	0.0346053	0.000628527	390.79	51.8475	234.325	5.46166	219.307	3.91622
18DC50-9	27.6484	410.934	613.163	0.670186	0.0518511	0.00137805	0.248279	0.00753567	0.0346645	0.000503232	279.69	61.1025	225.177	6.12979	219.676	3.13536
18DC50-10	28.5145	391.39	639.438	0.612084	0.0485983	0.00117897	0.234021	0.00652434	0.0349344	0.000553857	127.865	52.7725	213.513	5.36844	221.357	3.44987
18DC50-11	22.6858	304.351	495.821	0.613833	0.0510587	0.00154612	0.24831	0.0070921	0.0355285	0.000500077	242.66	74.9875	225.202	5.76882	225.057	3.1131
18DC50-12	25.6574	314.855	572.547	0.549919	0.0509785	0.00123128	0.249972	0.0060797	0.035656	0.000506216	238.955	55.545	226.554	4.93873	225.85	3.15093
18DC50-13	19.4965	309.569	431.021	0.718223	0.0544295	0.00254138	0.257722	0.0134341	0.0343037	0.000735155	387.09	110.175	232.83	10.846	217.428	4.58194
18DC50-14	32.2319	459.506	710.096	0.647103	0.0501085	0.0011264	0.243605	0.00603026	0.0353668	0.000586925	198.23	51.8425	221.368	4.92365	224.05	3.65432
18DC50-15	22.1068	282.32	497.933	0.566983	0.0534015	0.00182624	0.252696	0.0080141	0.0346639	0.000673011	346.35	77.77	228.764	6.49598	219.672	4.19316
18DC50-16	19.3897	305.184	437.828	0.697041	0.0520632	0.00151933	0.245562	0.00722725	0.0343178	0.000447187	287.1	66.66	222.965	5.89173	217.515	2.78711
18DC50-17	18.9107	243.823	430.373	0.566538	0.0515858	0.00145917	0.252335	0.00899383	0.0353263	0.000668925	333.39	60.1775	228.471	7.29225	223.798	4.16503
18DC50-18	37.3602	618.667	834.452	0.741405	0.0506693	0.00123785	0.238277	0.00577465	0.0344089	0.000565832	233.4	55.545	217.009	4.73523	218.083	3.52625
18DC50-19	47.6362	802.318	1034.74	0.775379	0.0505973	0.000999053	0.245089	0.00579528	0.035119	0.000493173	233.4	78.69	222.579	4.72615	222.507	3.07134
18DC53-1	10.8043	119.852	256.288	0.467645	0.0498125	0.00188438	0.231963	0.010236	0.033523	0.000604282	187.12	88.875	211.818	8.43667	212.56	3.7691
18DC53-2	6.49507	85.1822	150.972	0.564225	0.0524341	0.00291908	0.239066	0.0131004	0.0332793	0.00057619	305.615	127.76	217.655	10.7358	211.04	3.59473
18DC53-3	20.106	378.675	426.562	0.887737	0.0517872	0.00144355	0.240761	0.0066133	0.0338659	0.000428773	275.99	64.8075	219.043	5.41208	214.698	2.67351
18DC53-4	14.2703	173.554	324.773	0.534385	0.0519149	0.00170783	0.245338	0.00894475	0.0341586	0.000525216	283.395	71.2875	222.783	7.2932	216.523	3.27393
18DC53-5	24.9716	319.876	572.578	0.558659	0.053425	0.00154648	0.244158	0.00719186	0.0331749	0.00045636	346.35	64.81	221.82	5.86949	210.389	2.84743
18DC53-6	26.9344	288.8	640.508	0.450893	0.0489456	0.00177256	0.220912	0.00754403	0.032795	0.000680302	146.38	85.1725	202.669	6.27414	208.017	4.24625
18DC53-7	21.5971	259.095	493.647	0.524859	0.0505542	0.00174098	0.237567	0.00833866	0.0341025	0.000549703	220.44	79.6175	216.426	6.8417	216.174	3.42676
18DC53-8	33.1553	364.465	756.381	0.481853	0.0515851	0.00131141	0.243749	0.00625279	0.0343208	0.000481996	333.39	57.4	221.486	5.10475	217.534	3.00404
18DC53-9	35.8609	643.238	750.863	0.856666	0.0488211	0.00125464	0.234778	0.00648963	0.0350193	0.000678455	138.975	61.105	214.135	5.3366	221.886	4.22562
18DC53-10	7.77165	83.7148	182.76	0.45806	0.0478278	0.00320227	0.220695	0.0137043	0.0339617	0.000888383	100.09	142.57	202.488	11.3998	215.296	5.53878
18DC53-11	35.886	588.669	768.404	0.766094	0.0497917	0.00126131	0.239642	0.00675218	0.034822	0.000474281	187.12	59.25	218.127	5.53073	220.657	2.95453
18DC53-12	19.4582	175.482	457.371	0.383676	0.0476291	0.00265037	0.223916	0.0126754	0.0342182	0.000807196	79.72	129.61	205.163	10.5162	216.895	5.03136
18DC53-13	24.6547	282.808	573.325	0.493277	0.0501724	0.00107503	0.236486	0.00581234	0.0342588	0.000586217	211.185	49.99	215.539	4.77303	217.148	3.65383
18DC53-14	18.185	254.758	418.748	0.608381	0.04927	0.00144343	0.233931	0.00781899	0.0344545	0.000657128	161.195	63.8775	213.439	6.43421	218.367	4.09503
18DC53-15	24.334	314.234	558.701	0.562436	0.0513347	0.00199436	0.237003	0.00841269	0.0336526	0.000592778	257.47	88.875	215.964	6.90559	213.368	3.69688
18DC53-16	38.2608	485.805	871.24	0.557602	0.0510238	0.00152799	0.240558	0.00766315	0.0341928	0.000528027	242.66	68.5075	218.877	6.27228	216.736	3.29134
18DC53-17	19.0372	171.003	452.548	0.377867	0.049368	0.00206287	0.234305	0.010036	0.0346897	0.000751213	164.9	98.1325	213.747	8.25617	219.833	4.68027
18DC53-18	623.106	261.958	676.52	0.387214	0.07565	0.00265	1.65415	0.05746	0.15775	0.0019	1086	50	991	22	944	11
18DC53-19	1557.24	2580.81	2645.05	0.975711	0.10462	0.00499	4.03957	0.17215	0.28004	0.00601	1708	90	1642	35	1592	30
18DC53-20	557.993	1569.43	2832.87	0.554006	0.08991	0.00265	3.53511	0.25608	0.2918	0.02034	1424	62	1535	57	1651	102
18DC68-1	48.957	677.286	1154.56	0.586617	0.047274	0.00182031	0.220992	0.00875974	0.0339097	0.000564671	64.91	88.88	202.735	7.28477	214.971	3.52072
18DC68-2	8.54638	104.798	210.85	0.497024	0.0477089	0.00206646	0.21587	0.00945136	0.0330084	0.000451689	83.425	99.99	198.467	7.89307	209.349	2.81873
18DC68-3	10.5696	149.588	250.162	0.597966	0.051431	0.002335	0.238515	0.0105317	0.033892	0.000524211	261.175	103.688	217.204	8.63449	214.861	3.26851
18DC68-4	22.7275	299.684	520.925	0.575293	0.0511181	0.00131371	0.24304	0.00694844	0.0344858	0.000504972	255.62	59.2475	220.907	5.67592	218.562	3.14674
18DC68-5	19.2465	213.736	443.454	0.48198	0.0486179	0.00129415	0.23784	0.00660896	0.0356469	0.000561345	127.865	62.955	216.65	5.42129	225.794	3.49411
18DC68-6	21.2773	153.595	519.132	0.295868	0.0598236	0.00214209	0.279935	0.0104263	0.0339498	0.000482328	598.17	77.765	250.606	8.27142	215.222	3.00719
18DC68-7	22.592	236.615	545.41	0.43383	0.0503665	0.00143201	0.235795	0.00704019	0.0339902	0.000413543	213.035	64.805	214.972	5.78459	215.473	2.57824
18DC68-8	11.4033	145.998	273.002	0.534789	0.0549662	0.00215578	0.252286	0.00974613	0.0335894	0.000579606	409.31	87.0275	228.432	7.90255	212.974	3.61496
18DC68-9	15.0323	159.43	351.175	0.45399	0.0485492	0.00157204	0.236817	0.00878294	0.0353198	0.00059641	127.865	77.7675	215.811	7.21061	223.758	3.71355
18DC68-10	11.2308	132.342	258.823	0.511322	0.0461984	0.00195215	0.21827	0.00897544	0.0347373	0.000801248	9.36	96.285	200.469	7.48083	220.13	4.99178
18DC68-11	12.223	163.757	277.262	0.59062	0.0518822	0.00187942	0.245804	0.00838398	0.034809	0.00053546	279.69	83.32	223.162	6.8334	220.576	3.33569
18DC68-12	14.763	142.823	332.966	0.428941	0.0625848	0.00367854	0.299331	0.0178819	0.0349837	0.000920952	694.455	124.825	265.878	13.975	221.665	5.73617
18DC68-13	9.04558	100.642	214.095	0.470081	0.051108	0.00234473	0.238806	0.0116449	0.0339824	0.000651493	255.62	73.1375	217.442	9.54496	215.425	4.06177
18DC68-14	16.3135	200.584	389.472	0.515016	0.0505319	0.00183137	0.235252	0.00860021	0.0339172	0.000527378	220.44	50.9175	214.525	7.06953	215.018	3.28817
18DC68-15	9.8511	164.675	229.301	0.71816	0.0464709	0.00318281	0.20735	0.012294	0.0329434	0.000789031	20.47	168.5	191.327	10.3396	208.944	4.9242
18DC68-16	900.583	373.432	2122.19	0.175965	0.07999	0.00265	2.06009	0.06987	0.18441	0.00226	1197	47	1136	23	1091	12
18DC68-17	708.989	740.115	1255.08	0.589694	0.0727854	0.00205552	1.92662	0.0541358	0.188814	0.00192084	1009.26	57.4125	1090.37	18.7844	1114.94	10.4159
18DC68-18	516.77	300.577	726.034	0.413998	0.110131	0.00285481	4.36972	0.143156	0.282905	0.00589885	1811.11	47.225	1706.63	27.0764	1605.98	29.6411
18DC68-19	1497.78	1135.19	2101.5	0.540181	0.0899117	0.00265128	3.53511	0.256077	0.291798	0.0203415	1433.34	56.64	1535.11	57.3952	1650.51	101.518
